# Supplementary material for: A preclinical study: correlation between PD-L1 PET imaging and the prediction of therapy efficacy of MC38 tumor with 68Ga-labeled PD-L1 targeted nanobody
Source: Aging (Albany NY). 2021 Apr 27;13(9):13006–22. doi: 10.18632/aging.202981 (PMC8148448; doi:10.18632/aging.202981)
Supplement: Supplementary Figures [file aging-13-202981-s001.pdf]

SUPPLEMENTARY FIGURES

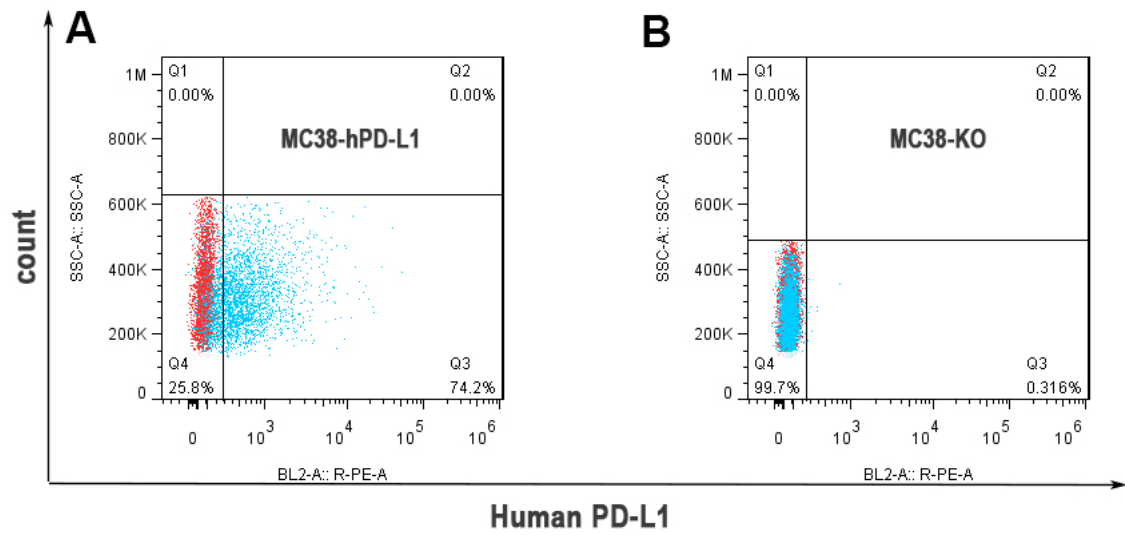

**Supplementary Figure 1.** The expression of human PD-L1 in MC38-hPD-L1 (A) and MC38-KO (B) cell lines were measured by flow cytometry.

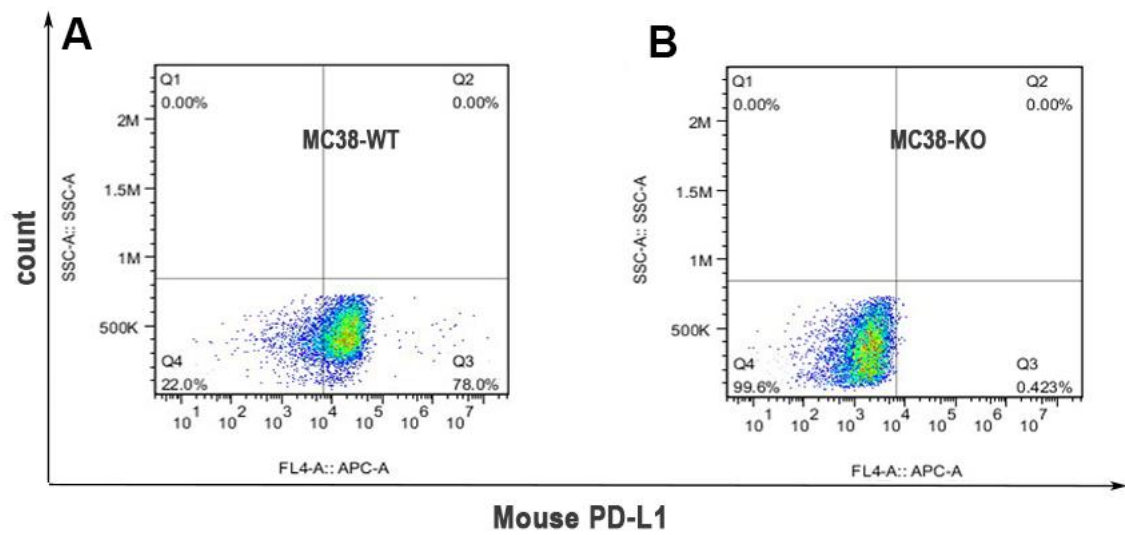

**Supplementary Figure 2.** The expression of mouse PD-L1 in MC38 wild type (A) and MC38-KO (B) cell lines were measured by flow cytometry.

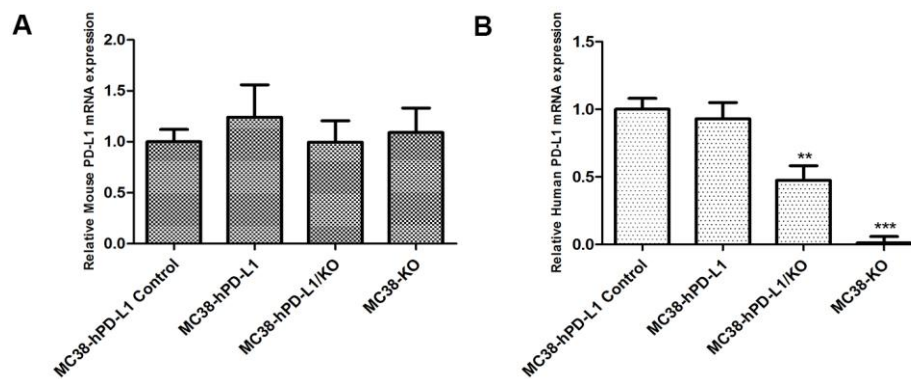

**Supplementary Figure 3. RT-PCR quantitative analysis.** (A) Quantitative analysis of mouse PD-L1 in MC38 tumors. (B) Quantitative analysis of human PD-L1 in MC38 tumors. \*\*\*P < 0.001, \*\*P < 0.01, \*P < 0.05.
